# Supplementary material
Source: MDPI journal article supplement (https://www.mdpi.com/2071-1050/14/11/6914)
Supplement: s1 [file s1]

Archive with 2 entries (2 files):
- File S1_CBM.pdf
- Supplementary Material.xlsx
