# Supplementary material
Source: MDPI journal article supplement (https://www.mdpi.com/2071-1050/14/11/6914)
Supplement: s1 [file s1 › Supplementary Material.xlsx]

## Sheet: S1 - Restaurant Survey Data
ID	Manager Experience (years)	Number of years working in this Restaurant (years)	Daily Turnover	Restaurant Type	Meal Type	Restaurant Category	Food Waste Daily (kg)	Waste Per Portion (g)	Total Procured Weight (kg)	Percentage Waste (%)	Vegetable Procurement Frequency	Vegetable Procurement Weight (kg)	Chicken Procurement Frequency	Chicken Procurement Weight (kg)	Plate Leftover	Primary Waste Reason	Secondary Waste Reason	Food Waste in Ramadhan	WeeklyFoodWaste	Food Waste Segregation	Food Waste Tracking	Food Waste Tracking Frequency	Food Waste Tracking Method	Food Waste Tracking Constraints	Food Waste Reduction	Wrap Surplus Food	Store Surp Food	Donate Surplus Food	Animal Feed Surplus Food	Compost Surplus Food	LandFill Surplus Food	Staff Surplus Food	Food Donation	Food Donation Amount	Food Donation Recipient	Primary Food Donation Constraint	Secondary Food Donation Constraint	Food Waste Recycling	Food Waste Recycling Amount (kg)	Food Waste Recycling Method	Food Waste Recycling Constraints
1	.	.	140	Ala carte	Lunch + Dinner	Rs. 700 - Rs. 1,200	.	.	.	.	Daily	.	Daily	.	None left	Food waste during preparation and serving stage	.	Don't know	No change	No	No	.	.	.	Staff training in food handling and serving	Yes	No	No	No	No	Yes	No	No	.	.	.	.	No	.	.	.
2	.	.	325	Ala carte	Lunch + Dinner	Rs. 700 - Rs. 1,200	.	.	155	.	Daily	60	Daily	75	None left	Overproduction of food	.	By two folds	Weekends	No	No	.	.	Lack of time and requirement of additional resources	.	Yes	No	Yes	No	No	No	Yes	No	.	.	Negligible waste	.	No	.	.	Additional cost associated with recycling
3	.	.	150	Ala carte	Lunch + Dinner	Less than Rs. 700	.	.	.	.	Daily	.	Daily	.	None left	Overproduction of food	.	By two folds	Weekdays	Yes	Yes	Other	Manual weighing and visual analysis	Lack of awareness about potential cost saving benefits	Accurate forecasting	Yes	No	Yes	No	No	No	Yes	Yes	.	.	.	.	No	.	.	Lack of awareness and knowledge
4	.	.	200	Fast food or take away	Breakfast+ Lunch + Dinner	Less than Rs. 700	2.5	12.5	.	.	Daily	.	Weekly	.	1/4th	Food returned due to customer dissatisfaction	.	No increase	Weekends	No	Yes	Once a week	Manual Weighing	.	.	Yes	No	No	No	No	No	Yes	No	.	.	.	.	No	.	.	Not allowed by administration
5	.	.	400	Ala carte	Lunch + Dinner	Rs. 700 - Rs. 1,200	1	.	.	.	Daily	.	Daily	.	None left	Overproduction of food	Spoliage of food	Don't know	Weekdays	Yes	Yes	.	Manual Weighing	.	Staff training in food handling and serving	Yes	No	No	No	No	No	Yes	No	.	.	.	.	No	.	.	Not allowed by administration
6	.	.	85	Ala carte	Lunch + Dinner	Rs. 700 - Rs. 1,200	1	.	.	.	Weekly	.	Weekly	.	Don't know	Food leftovers by customers	Disposal of food due to expiration	No increase	Weekdays	No	No	.	.	.	.	Yes	No	No	No	No	No	Yes	No	.	.	.	.	No	.	.	Not allowed by administration
7	.	.	60	Fast food or take away	Breakfast+ Lunch + Dinner	Less than Rs. 700	.	.	.	.	Weekly	10	Daily	.	1/4th	Food returned due to customer dissatisfaction	Spoliage of food	No increase	Weekdays	Yes	Yes	Once a week	.	.	Staff training in food handling and serving	Yes	No	No	No	No	Yes	No	No	.	.	.	.	No	.	.	.
8	.	.	150	Fast food or take away	Lunch + Dinner	Rs. 700 - Rs. 1,200	.	.	.	.	Biweekly	.	Weekly	.	None left	Food leftovers by customers	.	No increase	No change	No	No	.	Visual Analysis	.	.	Yes	No	No	No	No	No	No	No	.	.	.	.	No	.	.	.
9	.	.	100	Ala carte	Breakfast+ Lunch + Dinner	Less than Rs. 700	.	.	.	.	Daily	.	Biweekly	.	Don't know	Food returned due to customer dissatisfaction	.	Don't know	No change	Yes	Yes	Once a week	Manual Weighing	.	Accurate forecasting	Yes	No	No	No	No	No	No	No	.	.	.	.	No	.	.	.
10	.	.	100	Fast food or take away	Lunch + Dinner	Rs. 700 - Rs. 1,200	7	70	.	.	Daily	.	Daily	.	None left	Spoliage of food	.	No increase	Weekends	Yes	No	.	.	Lack of Awareness and food waste is negligible	Staff training in food handling and serving	Yes	No	No	No	No	Yes	No	No	.	.	Negligible waste	.	No	.	.	Lack of awareness and knowledge
11	.	.	200	Dinner Buffet + Hi-Tea + Ala carte	Breakfast+ Lunch + Dinner	More than Rs. 1,200	30	150	.	.	Daily	.	Daily	.	Don't know	Food leftovers by customers	Overproduction of food	Don't know	No change	No	No	.	.	.	.	Yes	Yes	No	No	No	Yes	Yes	No	.	.	Not allowed by the administration	.	No	.	.	.
12	.	.	25	Ala carte	Breakfast+ Lunch + Dinner	Less than Rs. 700	1.5	60	8	18.75	Daily	5	Daily	3	None left	Overproduction of food	.	By two folds	Weekends	No	No	.	.	Food waste is negligible	Other	Yes	No	No	No	No	Yes	Yes	No	.	.	Negligible waste	.	No	.	.	.
13	.	.	100	Fast food or take away	Lunch + Dinner	Rs. 700 - Rs. 1,200	.	.	60	.	Daily	20	Biweekly	40	None left	Overproduction of food	.	No increase	No change	Yes	Yes	Once a day	Visual Analysis	.	.	No	No	No	No	No	Yes	No	No	.	.	Negligible waste	.	No	.	.	.
14	.	.	225	Ala carte	Breakfast+ Lunch + Dinner	More than Rs. 1,200	25	111	.	.	Daily	.	Daily	.	1/4th	Food leftovers by customers	.	Don't know	No change	Yes	No	.	.	.	Other	Yes	No	No	No	No	Yes	No	No	.	.	Risk of potential liability	.	No	.	.	Lack of awareness and knowledge
15	.	.	60	Ala carte	Lunch + Dinner	Less than Rs. 700	3	50	.	.	Daily	.	Daily	18	None left	Food leftovers by customers	.	No increase	No change	No	No	.	.	Food waste is negligible	.	Yes	No	No	No	No	Yes	Yes	Yes	.	Other	.	.	No	.	.	Lack of awareness and knowledge
16	.	.	300	Ala carte	Lunch + Dinner	Less than Rs. 700	20	66.67	.	.	Daily	.	Daily	.	1/4th	Other	.	No increase	Weekends	No	No	.	.	.	Accurate forecasting	Yes	No	No	No	No	Yes	No	No	.	.	.	.	No	.	.	Lack of awareness and knowledge
17	.	.	.	.	.	More than Rs. 1,200	.	.	.	.	.	.	.	.	.	.	.	.	.	.	.	.	.	.	.	.	.	.	.	.	.	.	.	.	.	.	.	.	.	.	Not allowed by administration
18	.	.	25	Ala carte	Lunch + Dinner	More than Rs. 1,200	2.5	100	.	.	Daily	.	Daily	.	None left	Food leftovers by customers	.	No increase	No change	Yes	No	.	.	Food waste is negligible	.	Yes	No	No	No	No	No	Yes	Yes	.	.	.	.	No	.	.	.
19	.	.	150	Ala carte	Breakfast+ Lunch + Dinner	Rs. 700 - Rs. 1,200	20	133.33	.	.	Daily	.	.	.	1/4th	Food leftovers by customers	Disposal of food due to expiration	No increase	Weekdays	Yes	No	.	.	Lack of Awareness and food waste is negligible	Offer different portion sizes to customers	Yes	No	No	No	No	No	Yes	No	.	.	Risk of potential liability	Not allowed by the administration	No	.	.	Lack of awareness and knowledge
20	.	.	100	Ala carte	Breakfast+ Lunch + Dinner	Rs. 700 - Rs. 1,200	8	80	.	.	Daily	15	Daily	.	1/4th	Food leftovers by customers	.	By two folds	No change	Yes	No	.	.	Lack of awareness about potential cost saving benefits	.	Yes	No	No	No	No	No	Yes	No	.	.	.	.	No	.	.	Lack of awareness and knowledge
21	.	.	110	Ala carte	Lunch + Dinner	Less than Rs. 700	3	27.27	25	.	Daily	10	Biweekly	15	None left	Overproduction of food	Spoliage of food	Don't know	No change	Yes	No	.	.	.	.	Yes	No	No	No	No	Yes	No	No	.	.	Not sure where to donate	.	No	.	.	Lack of awareness and knowledge
22	.	.	.	Dinner Buffet + Hi-Tea + Ala carte	Breakfast+ Lunch + Dinner	More than Rs. 1,200	.	.	.	.	Daily	.	Daily	.	Don't know	.	.	Don't know	No change	Yes	No	.	.	.	.	Yes	No	No	No	No	Yes	No	No	.	.	.	.	No	.	.	.
23	.	.	500	Ala carte	Lunch + Dinner	Less than Rs. 700	30	60	150	21.42	Daily	50	Daily	90	Don't know	Spoliage of food	Food returned due to customer dissatisfaction	Don't know	Weekdays	Yes	No	.	.	Food waste is negligible	Accurate forecasting	Yes	No	No	No	No	Yes	No	No	.	.	Negligible waste	.	No	.	.	Additional cost associated with recycling
24	.	.	120	Ala carte	Lunch + Dinner	Rs. 700 - Rs. 1,200	3.5	29.16	118	.	Daily	18	Weekly	100	1/4th	Food leftovers by customers	Food returned due to customer dissatisfaction	No increase	No change	Yes	No	.	.	.	.	Yes	No	No	No	No	Yes	No	No	.	.	Negligible waste	.	No	.	.	Lack of awareness and knowledge
25	.	.	300	Ala carte	Breakfast+ Lunch + Dinner	Rs. 700 - Rs. 1,200	14	46.67	.	.	.	.	.	.	1/4th	2	Spoliage of food	No increase	Weekends	No	No	.	.	Lack of awareness about potential cost saving benefits	Other	Yes	No	Yes	No	No	Yes	No	No	.	.	.	.	Yes	.	Other	.
26	.	.	100	Ala carte	Breakfast+ Lunch + Dinner	More than Rs. 1,200	1	10	118	.	Daily	18	Weekly	100	1/4th	Food leftovers by customers	Spoliage of food	By two folds	Weekends	Yes	No	.	.	Food waste is negligible	Staff training in food handling and serving	Yes	No	No	No	No	No	Yes	No	.	.	.	.	Yes	.	Other	.
27	.	.	.	Ala carte	Lunch + Dinner	More than Rs. 1,200	.	.	.	.	Daily	.	Daily	.	None left	Food leftovers by customers	.	Don't know	No change	Yes	No	.	.	Lack of awareness about potential cost saving benefits	Accurate forecasting	Yes	No	No	No	No	No	Yes	Yes	.	Other	.	.	Yes	.	Other	.
28	5	4	100	6	Breakfast+ Lunch + Dinner	More than Rs. 1,200	2	20	.	.	Daily	20	Biweekly	.	1/4th	Food leftovers by customers	Food returned due to customer dissatisfaction	By two folds	Weekends	Yes	No	.	.	Food waste is negligible	Other	Yes	No	No	No	No	Yes	No	No	.	.	Negligible waste	.	No	.	.	Other
29	5	4	75	Ala carte	Lunch + Dinner	More than Rs. 1,200	6	80	.	.	Daily	.	.	.	1/4th	.	Food returned due to customer dissatisfaction	Don't know	No change	Yes	No	.	.	Lack of awareness about potential cost saving benefits	Other	Yes	No	No	No	No	Yes	No	No	.	.	Negligible waste	.	No	.	.	Lack of awareness and knowledge
30	5	4	30	Ala carte	Lunch + Dinner	More than Rs. 1,200	.	.	26	.	Daily	13	Daily	13	None left	.	Food leftovers by customers	No increase	Weekends	Yes	No	.	.	Food waste is negligible	Other	Yes	No	No	No	No	No	No	Yes	.	.	.	.	No	.	.	Other
31	5	4	750	Buffet	Breakfast+ Lunch + Dinner	More than Rs. 1,200	.	.	.	.	Daily	.	Daily	.	Don't know	Food leftovers by customers	.	No increase	No change	Yes	No	.	.	Food waste is negligible	.	Yes	No	No	No	No	No	Yes	No	.	.	Negligible waste	.	No	.	.	Lack of awareness and knowledge
32	5	4	500	Ala carte	Lunch + Dinner	Less than Rs. 700	25	50	.	.	Daily	.	Daily	.	1/4th	Food leftovers by customers	Food waste during preparation and serving stage	No increase	No change	Yes	No	.	.	Lack of awareness about potential cost saving benefits	Other	Yes	No	No	Yes	No	No	No	No	.	.	Negligible waste	.	Yes	.	.	.
33	5	2	.	Dinner Buffet + Hi-Tea + Ala carte	Breakfast+ Lunch + Dinner	Rs. 700 - Rs. 1,200	.	.	.	.	Daily	.	Daily	.	Don't know	Overproduction of food	.	No increase	Weekends	No	No	.	.	Lack of awareness about potential cost saving benefits	.	Yes	No	No	No	No	No	Yes	No	.	.	Negligible waste	.	No	.	.	Lack of interest
34	5	5	45	Fast food or take away	Breakfast+ Lunch + Dinner	Less than Rs. 700	1.5	33.33	.	.	Daily	.	Daily	28	None left	Overproduction of food	.	No increase	No change	Yes	No	.	.	Lack of awareness about potential cost saving benefits	.	Yes	No	No	No	No	No	No	No	.	.	.	.	No	.	.	Lack of awareness and knowledge
35	5	4	850	Ala carte	Lunch + Dinner	Less than Rs. 700	50	58.82	318	18.87	Daily	38	Daily	280	1/4th	Food leftovers by customers	.	No increase	No change	Yes	No	.	.	Lack of awareness about potential cost saving benefits	Offer different portion sizes to customers	Yes	No	No	No	No	No	No	No	.	.	Negligible waste	.	No	.	.	.
36	5	4	350	Ala carte	Lunch + Dinner	Less than Rs. 700	14	40	.	.	Triweekly	.	Daily	45	None left	Overproduction of food	.	No increase	Weekends	Yes	No	.	.	Lack of awareness about potential cost saving benefits	.	Yes	No	Yes	No	No	No	No	Yes	.	Other	.	.	No	.	.	Lack of awareness and knowledge
37	5	5	350	Ala carte	Lunch + Dinner	More than Rs. 1,200	40	114	170	23.52	Daily	70	Daily	100	None left	Spoliage of food	Food leftovers by customers	No increase	Weekends	No	No	.	.	Lack of awareness about potential cost saving benefits	.	Yes	No	No	No	No	Yes	No	No	.	Other	.	.	No	.	.	.
38	4	1	.	Ala carte	Lunch + Dinner	More than Rs. 1,200	2	80	.	.	Daily	.	Daily	10	None left	Food leftovers by customers	.	.	Weekends	No	No	.	.	Lack of awareness about potential cost saving benefits	.	Yes	No	No	No	.	Yes	No	Yes	.	.	Risk of potential liability	.	No	.	.	Other
39	5	5	75	Ala carte	Breakfast+ Lunch + Dinner	More than Rs. 1,200	8	106.67	.	.	Daily	.	Daily	.	.	Overproduction of food	.	No increase	Weekends	Yes	No	.	.	Lack of awareness about potential cost saving benefits	.	Yes	No	No	Yes	.	Yes	Yes	No	.	.	.	.	No	.	.	.
40	5	1	.	Ala carte	Lunch + Dinner	Rs. 700 - Rs. 1,200	25	125	.	.	Daily	.	Daily	70	.	Food leftovers by customers	.	Don't know	No change	Yes	No	.	.	Food waste is negligible	.	Yes	No	No	No	.	Yes	No	Yes	.	.	.	.	No	.	.	Lack of awareness and knowledge
41	5	5	.	Ala carte	Breakfast+ Lunch + Dinner	Rs. 700 - Rs. 1,200	20	133.33	140	14.29	Daily	40	Daily	100	1/4th	Food leftovers by customers	.	No increase	Weekends	Yes	No	.	.	Lack of awareness about potential cost saving benefits	.	Yes	No	No	No	.	Yes	No	No	.	.	Negligible waste	.	No	.	.	Lack of awareness and knowledge
42	5	5	125	Ala carte	Breakfast+ Lunch + Dinner	Less than Rs. 700	12	96	.	.	Daily	.	Daily	.	1/4th	Food leftovers by customers	.	No increase	No change	Yes	No	.	.	Lack of awareness about potential cost saving benefits	Other	Yes	No	No	No	.	Yes	No	No	.	.	.	.	No	.	.	.
43	4	3	150	Ala carte	Lunch + Dinner	Less than Rs. 700	2	13	.	.	Daily	0.2	Daily	10	.	Overproduction of food	.	By two folds	No change	Yes	No	.	.	Lack of awareness about potential cost saving benefits	Offer different portion sizes to customers	Yes	No	No	No	.	Yes	No	Yes	.	.	Not allowed by the administration	.	No	.	.	Lack of awareness and knowledge
44	5	4	150	Ala carte	Lunch + Dinner	Less than Rs. 700	1.5	10	.	.	Daily	.	Daily	.	1/4th	Food leftovers by customers	.	No increase	Weekends	No	No	.	.	Lack of awareness about potential cost saving benefits	Other	Yes	No	No	Yes	.	No	Yes	No	.	.	.	.	No	.	.	.
45	5	5	.	Dinner Buffet + Ala carte	Breakfast+ Lunch + Dinner	More than Rs. 1,200	17	136	50	.	Daily	20	Daily	30	.	.	.	No increase	No change	Yes	No	.	.	Lack of awareness about potential cost saving benefits	.	Yes	No	Yes	No	.	No	No	No	.	.	.	.	Yes	.	Animal Feed	.
46	5	1	.	Ala carte	Lunch + Dinner	Less than Rs. 700	0.5	33	8	12.5	Daily	4	Daily	4	None left	Food leftovers by customers	.	By two folds	No change	Yes	No	.	.	Lack of awareness about potential cost saving benefits	Accurate forecasting	Yes	No	No	No	No	No	Yes	No	.	.	Negligible waste	.	Yes	.	.	.
47	5	5	.	Ala carte	Lunch + Dinner	More than Rs. 1,200	4	80	45	14.81	Daily	25	Daily	20	None left	.	.	Don't know	No change	Yes	No	.	.	Lack of awareness about potential cost saving benefits	Accurate forecasting	Yes	No	Yes	No	.	No	No	No	.	.	.	.	No	.	.	.
48	5	5	.	Ala carte	Lunch + Dinner	Rs. 700 - Rs. 1,200	7	70	.	.	Daily	.	Daily	50	1/4th	Food leftovers by customers	.	Don't know	No change	Yes	No	.	.	Lack of awareness about potential cost saving benefits	.	Yes	No	No	No	.	Yes	Yes	No	.	.	Negligible waste	.	No	.	.	Lack of awareness and knowledge
49	5	4	.	Ala carte	Lunch + Dinner	Rs. 700 - Rs. 1,200	0.25	50	.	.	Daily	.	Daily	20	Don't know	Food leftovers by customers	.	No increase	No change	No	No	.	.	Lack of awareness about potential cost saving benefits	Other	Yes	No	No	No	.	Yes	No	No	.	.	Negligible waste	.	No	.	.	Lack of interest

## Sheet: S2 - Hotel Survey Data
ID	Manager Experience (years)	Number of years working in this Hotel (years)	Daily Turnover	Daily Amount of Food Waste (kg)	Waste per Portion (g)	Restaurant Type	Meal Type	Vegetable Procurement Frequency	Vegetable Procurement Weight (kg)	Chicken Procurement Frequency	Plate Leftover	Primary Waste Reason	Secondary Waste Reason	Food Waste in Ramadhan	Weekly Food Waste	Food Waste Segregation	Food Waste Tracking	Food Waste Tracking Frequency	Food Waste Tracking Method	Food Waste Tracking Constraints	Food Waste Reduction	Wrap Surplus Food	Store Surp Food	Donate Surplus Food	Animal Feed Surplus Food	Compost Surplus Food	LandFill Surplus Food	Staff Surplus Food	Food Donation	Food Donation Amount	Food Donation Recipient	Primary Food Donation Constraint	Secondary Food Donation Constraint	Food Waste Recycling	Food Waste Recycling Amount (kg)	Food Waste Recycling Method	Food Waste Recycling Constraints
1	More than 5 years	More than 5 years	180	40	222.22	Ala carte	Breakfast + Lunch + Dinner	Daily	.	Daily	1/4th	.	.	.	.	Yes	No	.	.	Lack of awareness about potential cost saving benefits	Accurate forecasting	.	.	Yes	.	.	Yes	Yes	No	.	.	Risk of potential liability	.	No	.	.	Lack of interest
2	More than 5 years	6 months - 1 year	120	10	83	Breakfast Buffet + Hi-tea + Ala-carte	Breakfast + Lunch + Dinner	Daily	.	Daily	0.5	Disposal of food due to expiration	Spoilage of food	.	Weekends	Yes	No	.	.	.	.	.	.	.	.	.	Yes	.	No	.	.	.	.	No	.	.	Lack of awareness and knowledge
3	.	.	180	30	166.67	Buffet	Breakfast + Lunch + Dinner	Daily	.	Daily	1/4th	Overproduction of food	.	.	Weekends	Yes	No	.	.	Lack of time	.	Yes	.	.	.	.	Yes	Yes	No	.	.	.	.	No	.	.	Lack of time
4	More than 5 years	6 months - 1 year	80	15	188	Ala carte	Breakfast + Lunch + Dinner	Daily	35	.	None left	Overproduction of food	Spoilage of food	.	Weekends	Yes	No	.	.	Lack of awareness about potential cost saving benefits	Offer different portion sizes to customers	Yes	.	.	.	.	Yes	Yes	No	.	.	Negligible waste	.	No	.	.	Other
5	More than 5 years	More than 5 years	100	20	200	Breakfast Buffet + Hi-tea + Ala-carte	Breakfast + Lunch + Dinner	Daily	.	Daily	.	.	.	.	.	Yes	Yes	.	Other	.	.	Yes	.	.	.	.	Yes	No	.	.	.	.	.	No	.	.	Other
6	.	.	.	.	.	.	.	.	.	.	.	.	.	.	.	.	.	.	.	.	.	.	.	.	.	.	.	.	.	.	.	.	.	.	.	.	.
7	More than 5 years	2 - 5 years	10	.	.	Ala carte	Breakfast + Lunch + Dinner	Daily	.	Daily	1/4th	.	.	.	.	Yes	No	.	.	Food waste is negligible	.	.	.	.	.	.	Yes	.	No	.	.	.	.	No	.	.	Lack of awareness and knowledge
8	More than 5 years	More than 5 years	300	60	200	Buffet	Breakfast + Lunch + Dinner	Daily	.	Daily	.	Food leftovers by customers	.	.	.	Yes	Yes	.	.	.	.	.	.	.	.	.	Yes	Yes	No	.	.	Risk of potential liability	.	No	.	.	Other
9	More than 5 years	Less than 6 months	200	30	150	Buffet	Breakfast + Lunch + Dinner	Daily	.	Daily	1/4th	.	.	By two folds	Weekends	Yes	No	.	.	Lack of awareness about potential cost saving benefits	.	Yes	.	.	.	.	Yes	.	No	.	.	Risk of potential liability	8	No	.	.	Lack of interest
10	More than 5 years	6 months - 1 year	200	10	50	Buffet	Breakfast + Lunch + Dinner	Daily	.	Daily	1/4th	Food leftovers by customers	.	.	.	Yes	No	.	.	Lack of awareness about potential cost saving benefits	.	Yes	.	.	.	.	Yes	Yes	Yes	.	Orphanages/Care homes	.	.	No	.	.	Lack of interest
11	More than 5 years	6 months - 1 year	300	50	166.67	Buffet	.	Daily	.	.	.	Food leftovers by customers	.	.	.	Yes	Yes	.	.	.	.	.	.	.	.	.	Yes	Yes	No	.	.	.	.	No	.	.	Lack of awareness and knowledge
12	More than 5 years	Less than 6 months	400	20	50	Buffet	Breakfast + Lunch + Dinner	Daily	.	Daily	.	Food leftovers by customers	.	.	Weekends	Yes	Yes	.	Manual Weighing	.	.	.	.	.	.	.	.	.	.	.	.	.	.	.	.	.	.

## Sheet: S3 - Catering Survey Data
ID	Manager Experience Hospitality Sector	Manager Company Experience	Annual Customer Turnover	Annual Number of Events	Total Waste Amount per year (kg)	Average Waste (kg) Per Event	Waste per Customer	Percentage Waste (%)	Chicken Gravy Amount (kg) per Cauldron	Rice Amount (kg) per Cauldron	Chicken Amount (kg) per Rice Cauldron	Number of Gravy Cauldron Per 100 People	Number of Rice Cauldron Per 100 People	Extra Person Food Per 100 People	Average Chicken Portion Size	Average Mutton Portion Size	Vegetable Procurement Frequency	Chicken Procurement Frequency	Rice Procurement Frequency	Spices Procurement Frequency	Plate Leftover	Primary Waste Reason	Secondary Waste Reason	Food Waste Segregation	Food Waste Tracking	Food Waste Tracking Frequency	Food Waste Tracking Method	Food Waste Tracking Constraints	Food Waste Reduction	Wrap Surplus Food	Store Surp Food	Donate Surplus Food	Animal Feed Surplus Food	Compost Surplus Food	LandFill Surplus Food	Staff Surplus Food	Food Donation	Food Donation Amount	Food Donation Recipient	Primary Food Donation Constraint	Secondary Food Donation Constraint	Food Waste Recycling	Food Waste Recycling Amount (kg)	Food Waste Recycling Method	Food Waste Recycling Constraints
1	More than 5 years	More than 5 years	.	.	.	10	100	11.11	12	12	12	3	1	.	.	.	Daily	Daily	.	.	1/4th	Food leftovers by customers	.	Yes	No	.	.	Lack of time	.	Yes	No	No	No	No	Yes	.	No	.	.	Negligible waste	.	No	.	.	Lack of interest
2	More than 5 years	6 months - 1 year	.	.	.	7	70	7.78	10	10	10	4	1	.	.	.	Daily	Daily	.	.	1/4th	.	.	No	No	.	.	Don't know how to track food waste	.	Yes	No	No	No	No	Yes	Yes	.	.	Public schools	Negligible waste	.	No	.	.	Lack of awareness and knowledge
3	More than 5 years	More than 5 years	25000	.	4500	18	180	20	10	10	10	.	.	5	300	.	Daily	Daily	.	.	.	Food leftovers by customers	.	Yes	Yes	.	Manual Weighing	.	.	Yes	No	No	No	No	Yes	No	No	.	Orphanages/Care homes	.	.	Yes	.	Animal Feed	.
4	More than 5 years	More than 5 years	25000	.	6250	25	250	27.78	10	12	12	3	.	15	.	.	Daily	Daily	30	.	1/3rd	Food leftovers by customers	.	No	No	.	.	.	Other	Yes	No	No	No	No	No	No	No	.	.	.	.	Yes	.	Animal Feed	.
5	More than 5 years	More than 5 years	60000	300	.	.	.	.	12	12	12	3	.	0	.	700	Daily	Daily	.	.	.	Food leftovers by customers	.	Yes	No	.	.	Lack of time	.	Yes	No	No	No	No	Yes	Yes	No	.	.	Negligible waste	.	No	.	.	.
6	More than 5 years	More than 5 years	30000	.	2400	8	80	8.89	12	12	12	3	1	15	400	500	Daily	Daily	.	15	.	Food leftovers by customers	Overproduction of food	Yes	No	.	.	.	.	Yes	No	No	No	No	Yes	Yes	No	.	.	Negligible waste	.	Yes	.	Animal Feed	.
7	More than 5 years	More than 5 years	.	.	.	15	150	16.67	12	10	10	.	.	10	300	.	Daily	Daily	15	15	1/4th	Food leftovers by customers	.	Yes	No	.	.	.	.	Yes	No	No	No	No	Yes	Yes	Yes	.	Private donation organisations	.	.	No	.	.	.
8	1-2 years	.	120000	600	6000	5	50	5.56	12	12	12	3	.	10	300	400	Daily	Daily	30	.	.	Food leftovers by customers	.	Yes	No	.	.	.	.	Yes	No	No	No	No	Yes	Yes	No	.	.	.	.	Yes	.	Animal Feed	.
9	More than 5 years	More than 5 years	30000	150	6000	20	200	22.22	12	.	.	3	.	.	.	.	Daily	Daily	30	.	1/4th	Food leftovers by customers	.	Yes	No	.	.	Lack of awareness about potential cost saving benefits	.	Yes	No	No	No	No	Yes	Yes	No	.	.	.	.	No	.	.	.
10	More than 5 years	More than 5 years	.	.	.	.	.	.	.	.	.	.	.	.	.	.	Daily	Daily	.	.	.	.	.	.	No	.	.	.	.	Yes	No	No	No	No	Yes	Yes	No	.	.	.	.	No	.	.	Lack of interest
11	More than 5 years	2 - 5 years	100000	.	.	.	.	.	12	12	12	3	.	15	300	400	Daily	Daily	10	.	.	Food leftovers by customers	.	Yes	No	.	.	.	.	Yes	No	No	No	No	Yes	Yes	No	.	.	Negligible waste	.	No	.	.	Lack of interest
12	More than 5 years	More than 5 years	68000	340	10200	15	150	16.67	.	.	.	3	.	10	.	.	Daily	Daily	30	.	1/4th	Food leftovers by customers	.	Yes	No	.	.	.	.	Yes	No	No	No	No	No	Yes	No	.	.	.	.	.	.	.	.
13	More than 5 years	More than 5 years	80000	.	20000	25	250	27.78	12	.	.	3	.	.	400	.	Daily	Daily	30	.	Don't know	Food leftovers by customers	Food returned due to customer dissatisfaction	No	No	.	.	.	.	Yes	No	No	.	.	.	Yes	No	.	.	.	.	Yes	.	.	.
14	.	.	20000	.	1400	7	70	7.78	10	.	.	.	.	20	.	.	Daily	Daily	.	.	.	Food leftovers by customers	.	Yes	No	.	.	.	.	Yes	.	.	.	.	.	Yes	No	.	.	Negligible waste	.	No	.	.	.
15	More than 5 years	More than 5 years	60000	300	.	.	.	.	12	.	.	.	.	0	250	400	Daily	Daily	.	.	.	Food leftovers by customers	.	Yes	No	.	.	Lack of awareness about potential cost saving benefits	.	Yes	.	.	.	.	Yes	Yes	No	.	.	.	.	No	.	.	Lack of time

## Sheet: S4 - Live Tracking Data
	ID Number	Category	Number of Customer								ID Number	Category	Amount of Items Procured (kg)
			Monday	Tuesday	Wednesday	Thursday	Friday	Saturday	Sunday				Monday	Tuesday	Wednesday	Thursday	Friday	Saturday	Sunday
	1	Hotel	.	.	.	.	.	.	.		1	Hotel	.	.	.	.	.	.	.
	2	Restaurant	108	116	112	130	160	155	130		2	Restaurant	.	.	.	.	.	.	.
	3	Restaurant	5	2	10	2	3	5	7		3	Restaurant	1.25	0.5	3	0.7	0.75	1.5	2
	4	Restaurant	40	70	50	30	40	60	50		4	Restaurant	10	17	12	7.5	10	15	12
	5	Restaurant	50	80	40	30	45	55	50		5	Restaurant	15	19	10	8	12	16	17
	6	Restaurant	208	220	250	230	280	310	295		6	Restaurant	60	60	40	45	65	40	30
	7	Restaurant	63	70	55	90	118	130	102		7	Restaurant	20	24	18	33	40	46	37
	8	Restaurant	158	161	188	146	138	149	112		8	Restaurant	145	150	160	140	120	120	110
	9	Restaurant	135	101	160	156	103	124	.		9	Restaurant	40.4	41.45	56	57.7	29.8	46.88	.
	ID Number	Category	Amount of Waste (kg)
			Monday	Tuesday	Wednesday	Thursday	Friday	Saturday	Sunday
	1	Hotel	80	40	45	35	40	43	39
	2	Restaurant	6.7	7.8	8.5	9.5	12	11.4	9.9
	3	Restaurant	0	0	0.2	0	0	0	0.25
	4	Restaurant	0	0.25	0	0	0.25	0.4	0
	5	Restaurant	0.5	0.3	0	0.25	0.3	0.45	1
	6	Restaurant	25	20	17	18	22	15	13
	7	Restaurant	4	5.5	3.5	7	8.5	10	7.5
	8	Restaurant	10	15	15	10	10	10	10
	9	Restaurant	0.8	0	1.2	0	1.76	1.2	0
